# Supplementary material for: Characterization of Drugs with Good Glass Formers in Loaded-Mesoporous Silica and Its Theoretical Value Relevance with Mesopores Surface and Pore-Filling Capacity
Source: MDPI journal article supplement (doi:10.3390/ph15010093), 2022-01-13
Supplement: s1 [file s1]

## Supplementary Material

### FT-IR spectrum of MPS<sub>1</sub> and MPS<sub>2</sub>.

#### Method :

FT-IR measurements were conducted on FT-IR spectrometer (Bruker Optik GmbH, Ettlingen, Germany), using KBr tablet method. FT-IR spectra were obtained in the scan range of 400–4000 cm<sup>-1</sup> at a resolution of 4 cm<sup>-1</sup>.

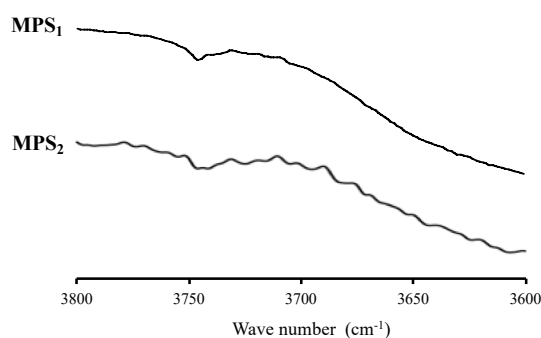

**Figure S1.** FT-IR spectrum of MS1 and MS2, in the OH stretch region.

Previous studies reported that MPS possesses a characteristic signal at around 3749 cm<sup>-1</sup> assigned to the stretching vibrations of isolated (i.e. non-hydrogen bonded) silanol groups [31,48]. MS<sub>1</sub> and MS<sub>2</sub> exhibited a characteristic signal at 3750 cm<sup>-1</sup> attributed to the stretching vibrations of isolated (i.e. non-hydrogen bonded) silanol groups. This indicated that on the surface of MPS could be only OH groups.

## <sup>29</sup>Si NMR spectra of MS<sub>1</sub> and MS<sub>2</sub>

### Method :

Solid-state <sup>29</sup>Si NMR was performed using a JNM-ECX-400 NMR system (9.4 T; JEOL Resonance Inc., Tokyo, Japan) equipped with a JEOL 4 mm HXMAS probe. A total of 10,000 scans were accumulated under the following conditions: spinning rate, 5 kHz; contact time, 2 ms. The samples were packed in 4 mm Zirconia rotors; while Tetramethylsilane was used as shift reference.

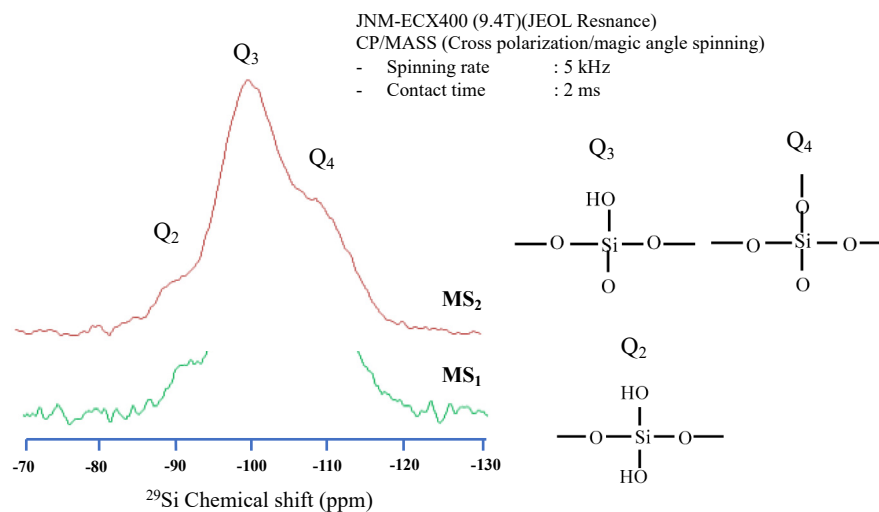

**Figure S2.** <sup>29</sup>Si NMR spectra of MS<sub>1</sub> and MS<sub>2</sub>.

The Q<sub>2</sub> and Q<sub>3</sub>, which was attributed to the silanol groups, was observed in both MS<sub>1</sub> and MS<sub>2</sub>. This indicated that OH groups were observed on the silica surface of MS<sub>1</sub> and MS<sub>2</sub>.

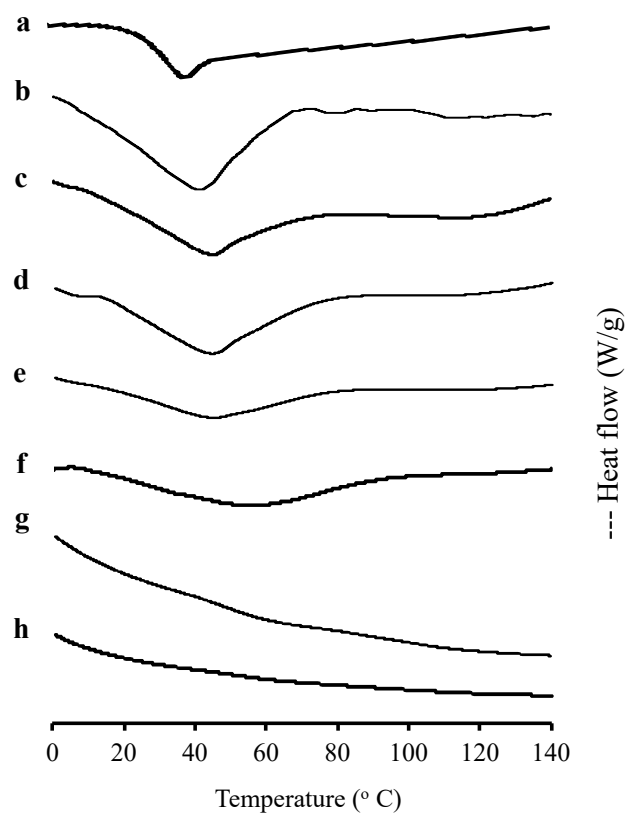

**Figure S3.** Nonreversible signal of (a) RTV EVPs, RTV/MPS<sub>i</sub> = (b) 8:2, (c) 7:3, (d) 6:4, (e) 5:5, (f) 4:6, (g) 3:7, and (h) MPS<sub>i</sub>.

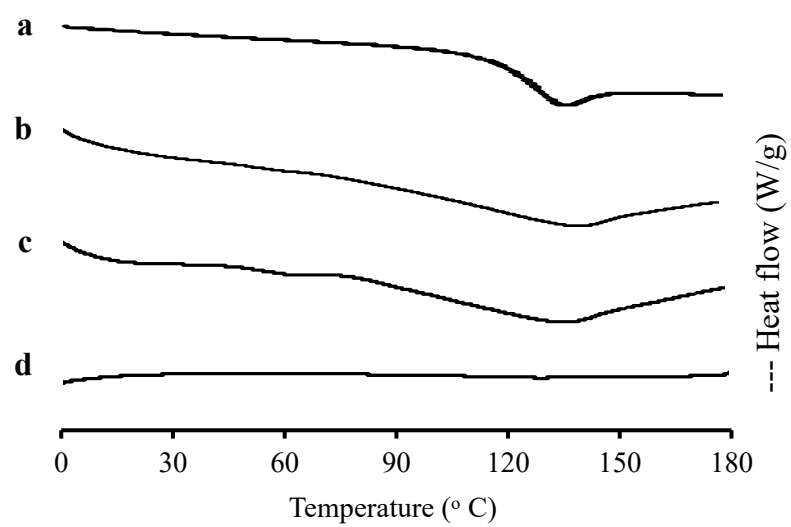

**Figure S4.** Nonreversible signal of (a) CYP amorphous, CYP/MPS<sub>1</sub> = (b) 7:3, (c) 5:5, and (d) 3:7.

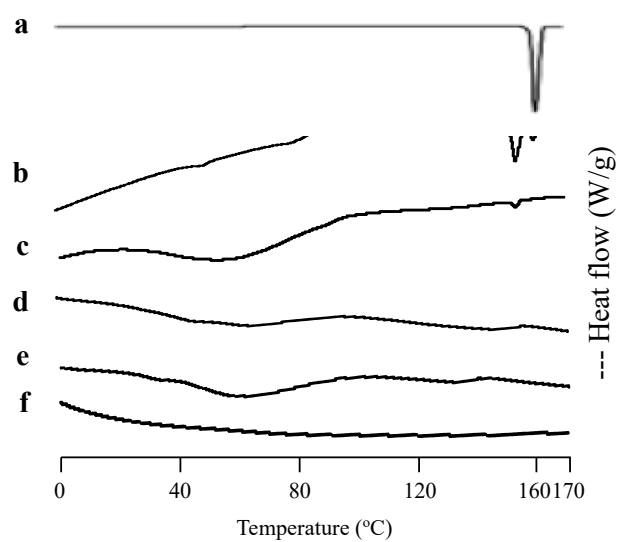

**Figure S5.** Nonreversible signal of (a)  $\gamma$ -IDM crystal, IDM/MPS<sub>2</sub> = (b) 4:6, (c) 3:7, (d) 2:8, (e) 1.5:8.5, and (f) MPS<sub>2</sub>.

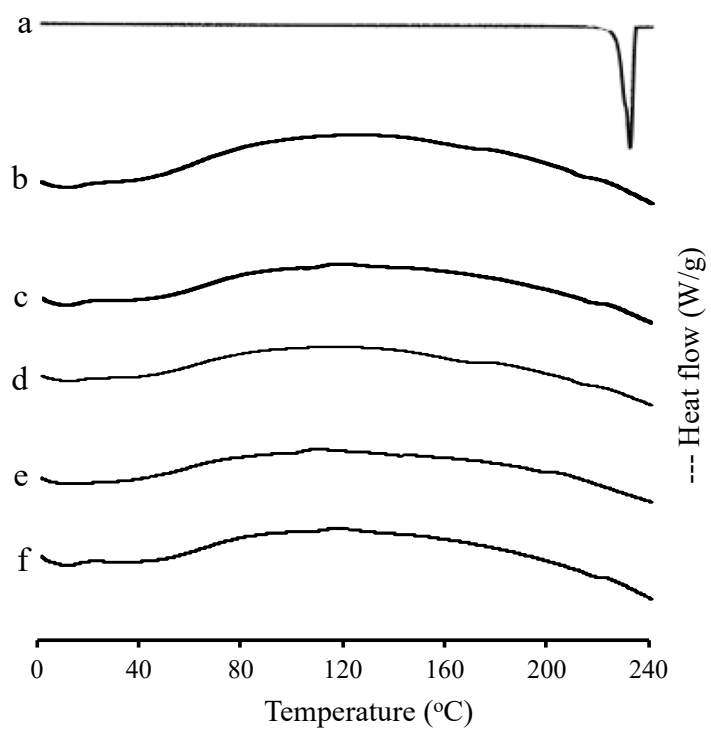

**Figure S6.** Nonreversible signal of (a) SAC crystal, evaporated sample of SAC/MPS<sub>1</sub> = (b) 4:6, (c) 3:7, (d) 2:8, (e) 1.5:8.5, and (f) 1:9.
